# Supplementary material for: Structure and function study of the complex that synthesizes S-adenosylmethionine
Source: PubMed Central journal article supplement (PMC4107924; doi:10.1107/s2052252514012585), 2014-06-12
Supplement: m-01-00240-sup1.pdf [file m-01-00240-sup1.pdf]

# IUCrJ

**Volume 1 (2014)**

**Supporting information for article:**

**Structure and function study of the complex that synthesizes  
S-adenosylmethionine**

**Ben Murray, Svetlana V. Antonyuk, Alberto Marina, Sebastian M. Van  
Liempd, Shelly C. Lu, Jose M. Mato, S. Samar Hasnain and Adriana L.  
Rojas**

## Supporting information

### S1. Material and methods

#### S1.1. Mutagenesis

Site-Directed mutagenesis was carried out in both the His-Parallel-MAT $\beta$ V1 and PET28-MAT $\beta$ V2 vectors using the Quikchange method (Stratagene). Primers used are described in table S5. Sequencing of all the plasmids was performed by the external service of CNIO (Centro Nacional de Investigaciones Oncologicas, Madrid).

#### S1.2. Circular Dichroism (CD)

CD data was recorded on a J-815 CD spectrometer (*Jasco, UK*) equipped with thermoelectric temperature control. Samples of MAT $\beta$ V1 and MAT $\beta$ V2 and the mutant variants were diluted to 1-5  $\mu$ M in 0.1 M Phosphate buffer pH 7.0 and placed in a 2-mm cell. All CD wavelength scans were performed at a constant temperature of 25 °C between 200 and 280 nm with a scanning speed of 50 nm/min and a data pitch of 1 nm. Data analysis was done using Origin and JASCO Spectra Manager integrated software. Raw data was converted to Ellipticity\*10<sup>-3</sup> (deg cm<sup>2</sup> dmol<sup>-1</sup>) using Microsoft excel.

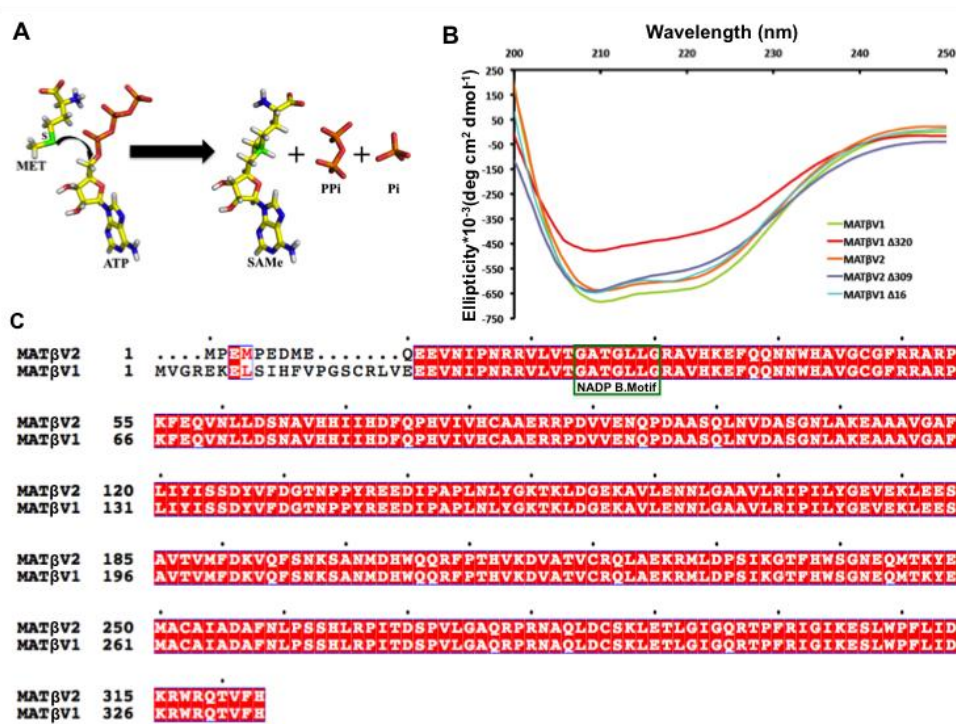

**Figure S1 Schematic representation of SAME synthesis, Circular Dichroism (CD)**

**spectrums of MATβ proteins and sequence alignment of MATβ isoforms.** (A) The formation of SAME occurs as an  $S_N2$  reaction with the nucleophilic attack of the methionine sulphur to the ATP C5' atom. Then, the intermediate triphosphosphate (PPPi) is hydrolyzed to pyrophosphate (PPi) and orthophosphate (Pi). (B) CD spectrums of MATβV1 (green), MATβV2 (orange), MATβV1Δ320 (red), MATβV2Δ309 (violet) and MATβV1Δ16 (blue). Comparison between the CD spectrums of the wild type and the mutants shows that the secondary structure is conserved after the deletion of the C-terminus (MATβV1Δ320 and MATβV2Δ309) or the N-terminus (MATβV1Δ16). (C) Sequence alignment of MATβV1 and MATβV2, residues that interact with MATα dimer are highlighted in blue and the NADP binding motif is also shown.

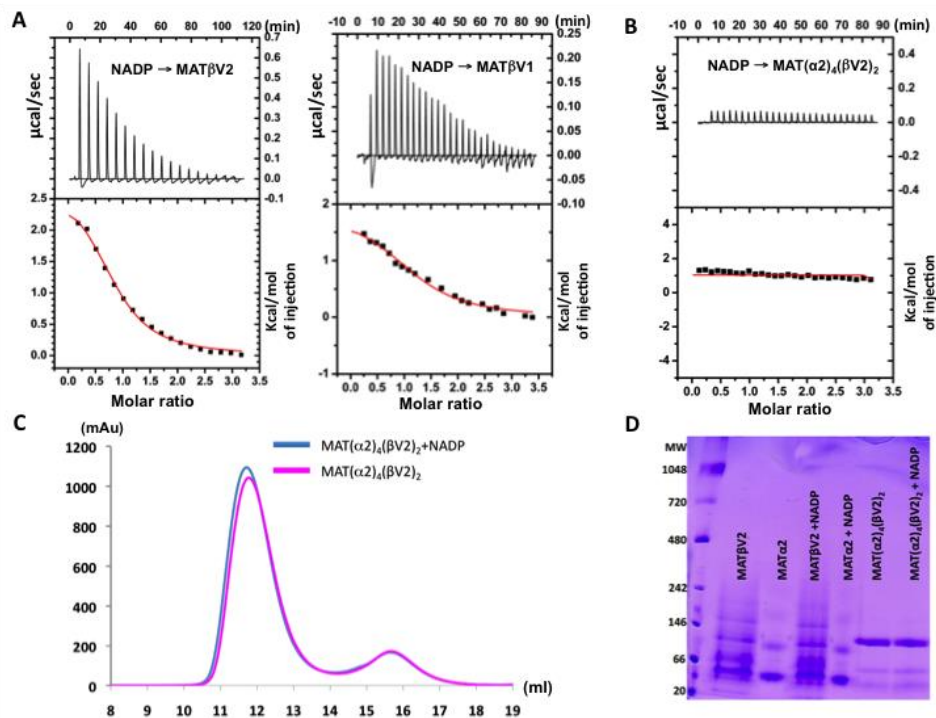

**Figure S2 Interaction of MAT $\alpha$ 2 $\beta$  complexes with NADP.** (A,B) Isothermal titration calorimetry of MAT $\beta$ V2, MAT $\beta$ V1 and MAT( $\alpha$ 2)<sub>4</sub>( $\beta$ V2)<sub>2</sub> complex with NADP. The top graphs represent the differential heat released during the titration of NADP with the different MAT subunits, the bottom graphs represent the fitted binding isotherms. (C) Gel filtration of MAT( $\alpha$ 2)<sub>4</sub>( $\beta$ V2)<sub>2</sub> complex with (blue) and without (magenta) NADP incubation and (D) Native-PAGE of MAT subunits and MAT( $\alpha$ 2)<sub>4</sub>( $\beta$ V2)<sub>2</sub> complex with and without NADP.

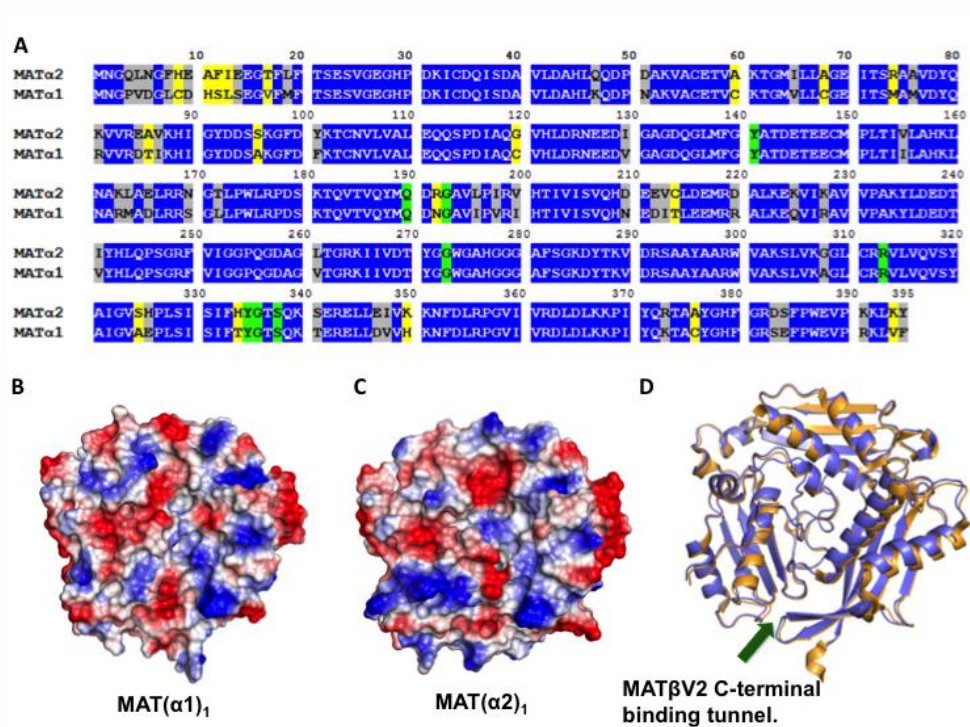

**Figure S3 Comparison between MAT $\alpha$ 1 and MAT $\alpha$ 2.** (A) Sequence alignment of the two catalytic MAT $\alpha$  subunits, in blue are residues that are equal, in green the residues of MAT $\alpha$ 2 that interact with MAT $\beta$ V2, in grey are residues that are similar and in yellow the residues that are different. (B) Electrostatic surface representation of MAT $\alpha$ 1 and (C) MAT $\alpha$ 2 shows different charge distribution at the surface of both proteins. Negative charge is shown in red colour, positive in blue. The surface potential has been calculated with Pymol/APBS. (D) Superposition of the MAT $\alpha$ 1 monomers (PDB:2OBV in orange) and MAT $\alpha$ 2 from the MAT( $\alpha$ 2)<sub>4</sub>( $\beta$ V2)<sub>2</sub> complex (slate), the green arrow represents the region where MAT $\beta$  C-terminal interacts.

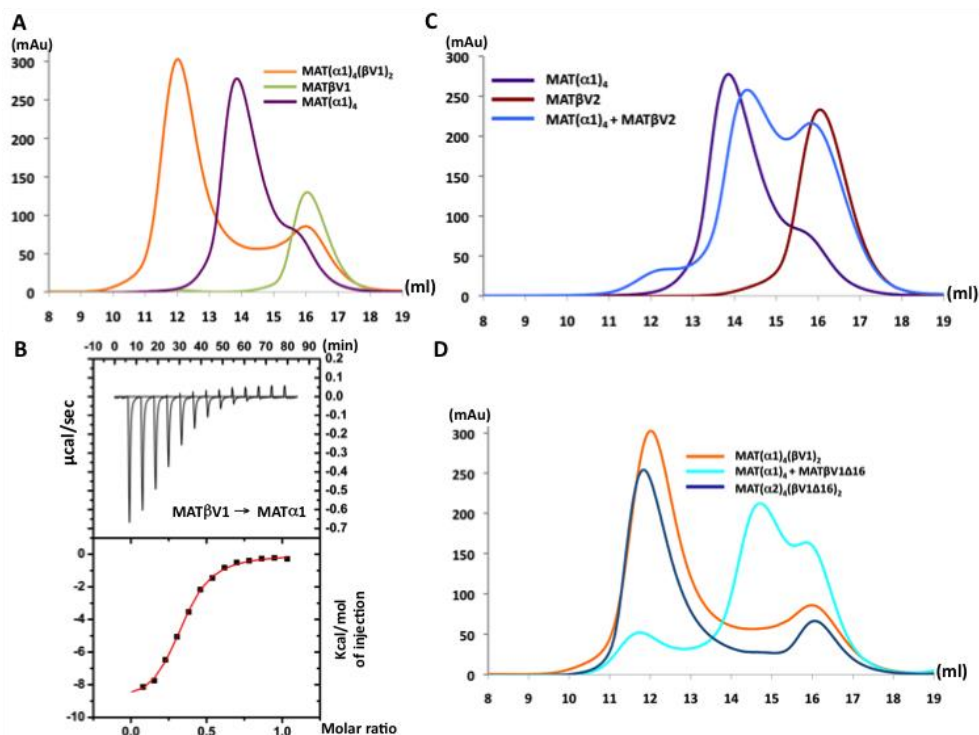

**Figure S4 Gel filtration (GF) and ITC of MAT $\alpha\beta$  complexes.** (A) MAT $\beta V 1$  (green) and MAT $(\alpha 1)_4$  (purple) were loaded in the GF column as a control in the same buffer of the MAT $(\alpha 1)_4(\beta V 1)_2$  complex (orange). (B) ITC of MAT $\alpha 1$  with MAT $\beta V 1$ , the top graph represents the differential heat released during the titration MAT $\beta V 1$  with MAT $\alpha 1$ . The bottom graph represents the fitted binding isotherms. (C) MAT $\beta V 2$  (dark red) and MAT $(\alpha 1)_4$  (purple) were loaded in the GF column as a control in the same buffer of the mix of both proteins (blue). Presence of a shoulder on the blue curve at  $\sim 12$  ml indicates the presence of small amount of the MAT $(\alpha 1)_4(\beta V 2)_2$  complex. (D) The gel filtration profile shows that the formation of a MAT $\alpha\beta$  complex when MAT $\alpha 2$  is mixed with MAT $\beta V 1\Delta 16$  (dark blue) is significantly larger when compared to when MAT $(\alpha 1)_4$  is used (cyan). MAT $(\alpha 1)_4(\beta V 1)_2$  complex was loaded as a control (orange).

**Table S1 Data collection and refinement statistics.** \*Highest resolution shell is shown in parenthesis

|                                                     | SAMe-bound                                    | ADO-bound                                     | PPNP-bound                                    |
|-----------------------------------------------------|-----------------------------------------------|-----------------------------------------------|-----------------------------------------------|
| <b>Data collection</b>                              |                                               |                                               |                                               |
| Wavelength                                          | 0.98                                          | 0.978                                         | 0.979                                         |
| Detector                                            | Pilatus 6M                                    | Pilatus 6M                                    | Pilatus 6M                                    |
| Space group                                         | P2 <sub>1</sub> 2 <sub>1</sub> 2 <sub>1</sub> | P2 <sub>1</sub> 2 <sub>1</sub> 2 <sub>1</sub> | P2 <sub>1</sub> 2 <sub>1</sub> 2 <sub>1</sub> |
| Cell dimensions                                     |                                               |                                               |                                               |
| <i>a</i> , <i>b</i> , <i>c</i> (Å)                  | 72.44, 115.72, 298.45                         | 72.09, 116.57, 299.48                         | 72.14, 122.18, 298.42                         |
| Resolution (Å)                                      | 50-2.6(2.69-2.6) *                            | 108.63-3.3 (3.48-3.3) *                       | 50-2.35 (2.43-2.35) *                         |
| <i>R</i> <sub>merge</sub> (%)                       | 14.4 (59.4)                                   | 13.9 (49.4)                                   | 10.1 (70.4)                                   |
| <i>I</i> / <i>σI</i>                                | 10.12 (1.75)                                  | 6.8 (2.7)                                     | 17.3 (1.6)                                    |
| Completeness (%)                                    | 98.7 (90.1)                                   | 99.9 (99.9)                                   | 98.0 (83.2)                                   |
| Redundancy                                          | 5.6 (4.5)                                     | 3.3 (3.5)                                     | 7.5 (5.2)                                     |
| <b>Refinement</b>                                   |                                               |                                               |                                               |
| Resolution (Å)                                      | 2.6                                           | 3.3                                           | 2.35                                          |
| No. reflections                                     | 76590                                         | 38907                                         | 108283                                        |
| <i>R</i> <sub>work</sub> / <i>R</i> <sub>free</sub> | 21.8/27.9                                     | 17.6/26.0                                     | 21.1/25.1                                     |
| No. atoms                                           |                                               |                                               |                                               |
| Protein                                             | 15061                                         | 16370                                         | 16463                                         |
| Ligand/ion                                          | 54 / 1                                        | 38 / 1                                        | 54 / 4                                        |
| Water                                               | 108                                           | 37                                            | 498                                           |
| <b>B-factors (Å<sup>2</sup>)</b>                    |                                               |                                               |                                               |
| Protein                                             | 76.64                                         | 71.19                                         | 58.4                                          |
| Ligand/ions                                         | SAMe / Mg                                     | ADO / Mg                                      | SAMe /PNPP /Mg                                |
|                                                     | 68.16 / 60.62                                 | 97.95/49.14                                   | 47.73 / 63.48 /39.57                          |
| Waters                                              | 56.13                                         | 30.67                                         | 48.39                                         |
| <b>Ramachandran Statistics</b>                      |                                               |                                               |                                               |
| Residues in Preferred Regions                       | 1920 (94%)                                    | 1863 (90%)                                    | 2001 (96%)                                    |
| Residues in Allowed regions                         | 108 (5%)                                      | 185 (9%)                                      | 76 (4%)                                       |
| Outliers                                            | 10(0.5%)                                      | 20 (1%)                                       | 8 (0.38%)                                     |
| <b>R.m.s deviations</b>                             |                                               |                                               |                                               |
| Bond lengths (Å)                                    | 0.006                                         | 0.008                                         | 0.005                                         |
| Bond angles (°)                                     | 1.091                                         | 1.265                                         | 1.026                                         |





**Table S2** Primers used in this study.

---

**MAT $\beta$ V1W320Stop and MAT $\beta$ V2W309Stop**

Forward:

5' GGAATCAAAGAATCACTTTAGCCTTTCCTCATTGACAAG 3'

Reverse:

5' CTTGTCAATGAGGAAAGGCTAAAGTGATTCTTTGATTCC 3'

**Mat $\beta$ V1 $\Delta$ 16**

Forward

5' TTTTTCATGGGACTCTCTATACTTTGTTCCCGGG 3'

Reverse

5' TTTTCTCGAGCTAATGAAAGACCGTTG 3'
